# Supplementary material for: Sex differences in cortical volume and gyrification in autism
Source: Springer Nature journal article supplement (doi:10.1186/s13229-015-0035-y), 2015-07-03
Supplement: MOESM1 [file 9785400]

**Additional Table 1: Full description of the participants included in the present study**

|    | Site    | ASD F |      | ASD M |      | CTL F |      | CTL M |      |
|----|---------|-------|------|-------|------|-------|------|-------|------|
|    |         | ID    | Age  | ID    | Age  | ID    | Age  | ID    | Age  |
| 1  | CALTECH | 51462 | 20.2 | 51468 | 20.1 | 51479 | 20.0 | 51478 | 19.7 |
| 2  | CALTECH | 51463 | 20.2 | 51465 | 20.2 | 51480 | 20.8 | 51483 | 20.9 |
| 3  | CALTECH | 51471 | 22.4 | 51457 | 22.9 | 51482 | 21.1 | 51488 | 23.3 |
| 4  | CALTECH | 51460 | 34.6 | 51461 | 37.7 | 51493 | 29.2 | 51476 | 39.3 |
| 5  | CMU     | 50644 | 19.0 | 50645 | 20.0 | 50661 | 20.0 | 50657 | 21.0 |
| 6  | CMU     | 50648 | 31.0 | 50653 | 30.0 | 50656 | 28.0 | 50666 | 31.0 |
| 7  | CMU     | 50650 | 31.0 | 50642 | 33.0 | 50669 | 30.0 | 50665 | 33.0 |
| 8  | KKI     | 50795 | 8.1  | 50802 | 8.2  | 50784 | 8.1  | 50777 | 8.4  |
| 9  | KKI     | 50792 | 8.2  | 50793 | 8.4  | 50790 | 8.8  | 50809 | 8.4  |
| 10 | KKI     | 50798 | 10.2 | 50791 | 10.2 | 50812 | 10.0 | 50782 | 10.2 |
| 11 | KKI     | 50796 | 12.0 | 50800 | 11.8 | 50810 | 11.9 | 50822 | 12.4 |
| 12 | LEUVEN  | 50743 | 14.2 | 50747 | 14.2 | 50723 | 13.8 | 50725 | 14.2 |
| 13 | LEUVEN  | 50749 | 15.3 | 50756 | 14.9 | 50735 | 14.3 | 50733 | 14.7 |
| 14 | MAX_MUN | 51606 | 29.0 | 51322 | 29.0 | 51368 | 28.0 | 51339 | 29.0 |
| 15 | MAX_MUN | 51325 | 32.0 | 51320 | 31.0 | 51366 | 32.0 | 51338 | 30.0 |
| 16 | MAX_MUN | 51321 | 45.0 | 51330 | 45.0 | 51372 | 46.0 | 51373 | 46.0 |
| 17 | NYU     | 50952 | 8.7  | 51011 | 8.8  | 51040 | 8.5  | 51081 | 8.8  |
| 18 | NYU     | 50958 | 10.2 | 50971 | 10.2 | 51044 | 10.9 | 51120 | 10.2 |
| 19 | NYU     | 50953 | 11.8 | 51007 | 11.9 | 51046 | 11.6 | 51122 | 11.9 |
| 20 | NYU     | 50956 | 14.1 | 50972 | 14.0 | 51051 | 14.1 | 51075 | 14.2 |
| 21 | NYU     | 50954 | 14.8 | 50999 | 14.5 | 51053 | 14.4 | 51100 | 14.4 |
| 22 | NYU     | 50957 | 14.8 | 50966 | 15.1 | 51054 | 14.4 | 51104 | 15.3 |
| 23 | NYU     | 50959 | 22.8 | 51027 | 23.0 | 51059 | 22.8 | 51151 | 23.1 |
| 24 | NYU     | 50962 | 24.4 | 51021 | 23.7 | 51061 | 27.0 | 51067 | 23.7 |
| 25 | NYU     | 50961 | 25.0 | 51029 | 26.5 | 51062 | 27.8 | 51153 | 26.2 |
| 26 | NYU     | 50960 | 38.8 | 51024 | 39.1 | 51063 | 29.1 | 51068 | 31.8 |
| 27 | OLIN    | 50127 | 14.0 | 50118 | 15.0 | 50113 | 15.0 | 50116 | 15.0 |
| 28 | OLIN    | 50119 | 19.0 | 50130 | 18.0 | 50114 | 20.0 | 50112 | 17.0 |
| 29 | OLIN    | 50125 | 24.0 | 50131 | 21.0 |       |      | 50109 | 20.0 |
| 30 | PITT    | 50029 | 11.4 | 50027 | 12.2 | 50036 | 13.3 | 50033 | 12.2 |
| 31 | PITT    | 50057 | 12.6 | 50028 | 12.7 | 50038 | 14.0 | 50051 | 12.8 |
| 32 | PITT    | 50023 | 12.6 | 50006 | 13.4 | 50049 | 15.8 | 50031 | 12.9 |
| 33 | PITT    | 50005 | 13.7 | 50056 | 13.6 | 50059 | 21.2 | 50043 | 13.8 |
| 34 | UCLA    | 51228 | 8.4  | 51249 | 8.5  | 51267 | 11.3 | 51278 | 9.2  |
| 35 | UCLA    | 51226 | 9.3  | 51295 | 10.0 | 51282 | 12.7 | 51308 | 9.8  |
| 36 | UCLA    | 51215 | 11.6 | 51202 | 11.6 | 51303 | 13.0 | 51262 | 11.6 |
| 37 | UCLA    | 51219 | 13.9 | 51300 | 14.1 | 51264 | 13.5 | 51266 | 14.0 |
| 38 | UCLA    | 51207 | 14.1 | 51297 | 14.3 | 51279 | 13.8 | 51269 | 14.3 |
| 39 | UCLA    | 51230 | 17.5 | 51237 | 17.4 |       |      | 51268 | 17.8 |
| 40 | UM      | 50300 | 9.7  | 50307 | 9.7  | 50357 | 9.5  | 50333 | 10.2 |
| 41 | UM      | 50302 | 10.4 | 50304 | 11.0 | 50374 | 9.7  | 50334 | 11.0 |
| 42 | UM      | 50285 | 12.8 | 50298 | 12.8 | 50338 | 13.5 | 50370 | 12.8 |
| 43 | UM      | 50319 | 15.0 | 50282 | 15.2 | 50369 | 14.8 | 50327 | 15.3 |
| 44 | UM      | 50276 | 16.8 | 50273 | 16.8 | 50340 | 16.1 | 50351 | 16.8 |
| 45 | UM      | 50321 | 18.0 | 50399 | 17.4 | 50341 | 18.2 | 50328 | 17.4 |
| 46 | YALE    | 50615 | 8.6  | 50609 | 8.9  | 50576 | 8.4  | 50554 | 8.7  |
| 47 | YALE    | 50627 | 9.5  | 50622 | 9.9  | 50565 | 11.0 | 50566 | 9.7  |
| 48 | YALE    | 50624 | 11.1 | 50626 | 11.1 | 50558 | 13.8 | 50571 | 11.0 |
| 49 | YALE    | 50620 | 12.8 | 50613 | 12.5 | 50563 | 13.9 | 50559 | 12.3 |
| 50 | YALE    | 50623 | 13.7 | 50603 | 13.3 | 50557 | 14.3 | 50561 | 13.3 |
| 51 | YALE    | 50604 | 14.4 | 50628 | 14.4 | 50555 | 14.4 | 50573 | 14.2 |
| 52 | YALE    | 50619 | 16.5 | 50605 | 16.0 | 50572 | 15.8 | 50551 | 15.9 |
| 53 | YALE    | 50621 | 16.6 | 50608 | 16.6 | 50569 | 16.7 | 50570 | 16.7 |

The IDs refer to the ones used in the ABIDE description that can be found at [http://fcon\\_1000.projects.nitrc.org/indi/abide/](http://fcon_1000.projects.nitrc.org/indi/abide/). After quality control, we identified for each female with ASD one ASD male, TD male and TD female with the closest age that was acquired in the same site. Each row in the table details the ID and age of the resulting “quartet”.
