# Supplementary material for: Sex differences in cortical volume and gyrification in autism
Source: Springer Nature journal article supplement (doi:10.1186/s13229-015-0035-y), 2015-07-03
Supplement: MOESM2 [file 9785400]

Supplementary Figure 1:  
Comparison of gyrification patterns two-by-two (whole brain analyses)

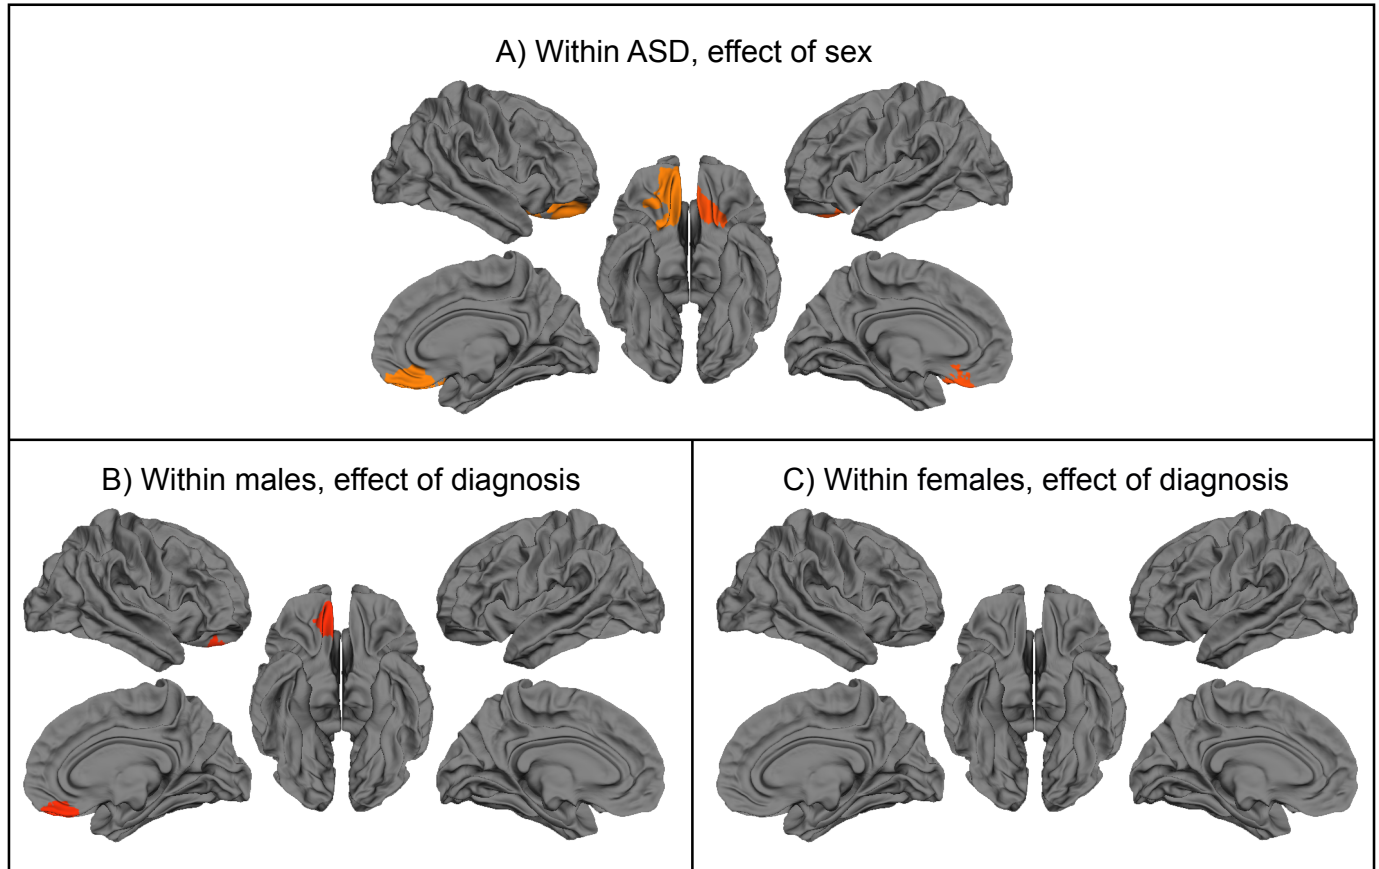

a) Within individuals with ASD, males showed significantly decreased gyrification in the bilateral orbitofrontal / ventromedial region compared to females.

b) Reduced gyrification in the vmPFC/OFC region was observed when comparing ASD males to TD males.

c) No significant differences was found when comparing ASD females and TD females. Overall, the results of whole-brain analyses support a robust decrease in the right vmPFC/OFC gyrification in ASD males compared to both TD males and ASD females.
